# Supplementary material for: Principal Component Analysis versus Subject’s Residual Profile Analysis for Neuroinflammation Investigation in Parkinson Patients: A PET Brain Imaging Study
Source: MDPI journal article supplement (doi:10.3390/jimaging8030056), 2022-02-25
Supplement: s1 [file s1]

Supplementary

# Principal Component Analysis versus Subject's Residual Profile analysis for Neuroinflammation investigation in Parkinson Patients: A PET brain imaging study

Rostom Mabrouk

Department of Computer Science, Bishop's University, Sherbrooke, QC J1M 1Z7, Canada;  
rostom.mabrouk@ubishops.ca

## Supplementary material

- *Measured free fraction*

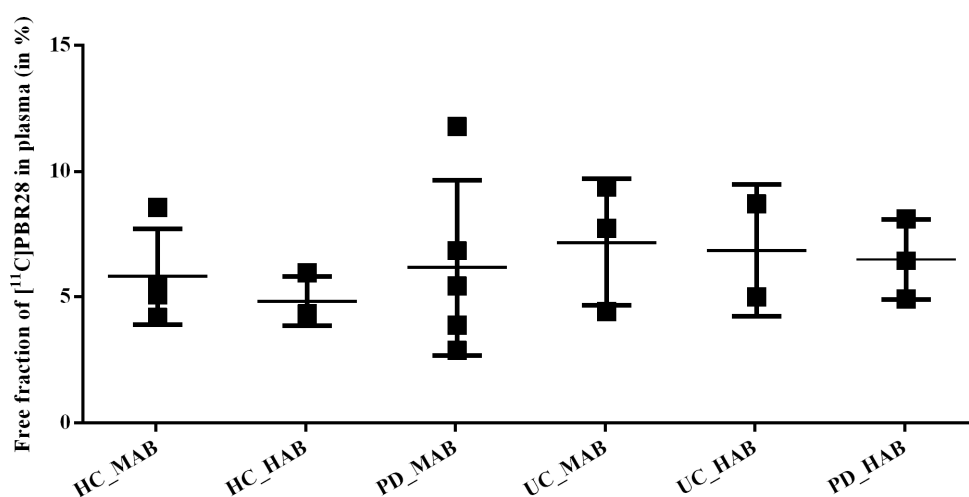

**Figure S1.** Free fraction measurement. The factorial ANOVA showed that there were no significant differences in measured  $fp$  ( $F_{(5,14)}=3.3$ ,  $p=0.8$ ).

- *Linear correlation between VT and SUV and between VT/fp and SUV*

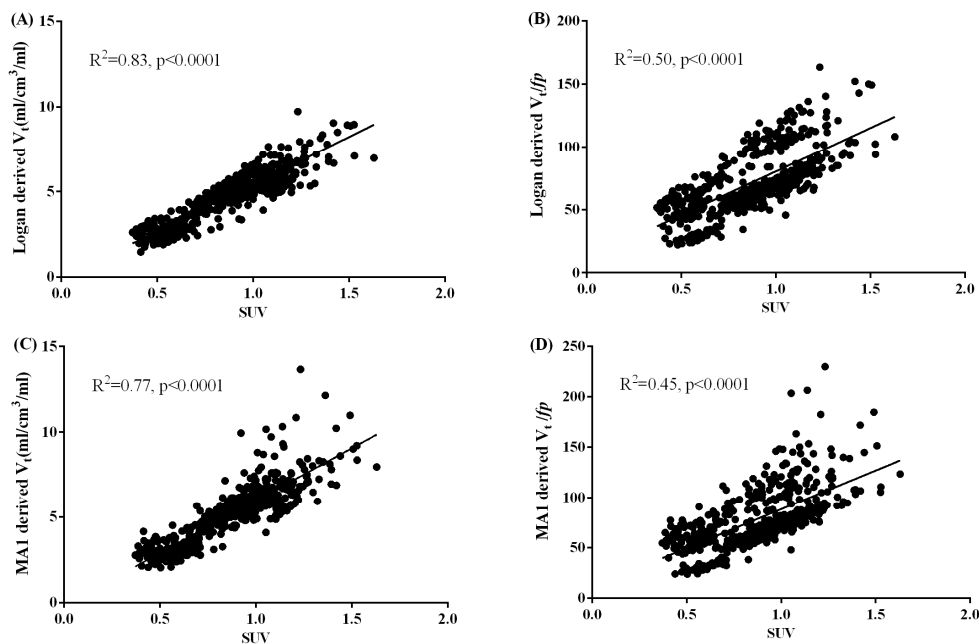

**Figure S2.** Linear regression analysis between  $^{11}\text{C}$ -PBR28 SUV calculated from the time interval 60-90 minutes post-injection and  $V_T$  derived with Logan plot and MA1 for the combined ROIs. Best correlation was found between SUV and Logan  $V_T$ .

- *Asymmetry index of SUV  $^{11}\text{C}$ -PBR28*

The asymmetry of  $^{11}\text{C}$ -PBR28 SUV in PD was examined using the percentage change between left and right-side tracer's uptake. Fig. S1 shows small change in ROIs (% change < 10%).

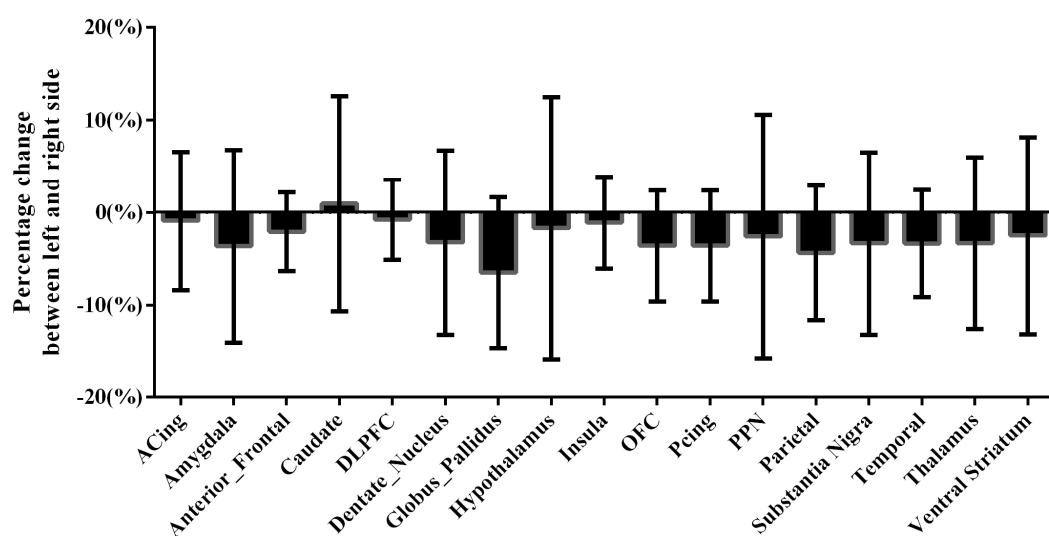

**Figure S3.** Percentage change between left and right side  $^{11}\text{C}$ -PBR28 SUV. Small ROIs had slightly higher percentage change compared to large ROIs.

- *Logan plot and MA1 derived total distribution volume and standard uptake value*

Total distribution volume ( $V_T$ ) derived from Logan analysis and MA1 using arterial input function. All value are presented in mean  $\pm$  standard deviation except for high affinity genotyped healthy control (HAB-HC) (number of subject =1).

**Table S1.** Regional  $^{11}\text{C}$ -PBR28  $V_T$  estimated with Logan plot in healthy control, PD and asymptomatic LRRK2 mutation carriers, stratified by genotype.

|    |     | WGM           | WWM           | Putamen       | Caudate       | SN            | Midbrain      | Medulla       | Cerebellum    |
|----|-----|---------------|---------------|---------------|---------------|---------------|---------------|---------------|---------------|
| HC | MAB | 2.5 $\pm$ 0.4 | 2.4 $\pm$ 0.4 | 2.5 $\pm$ 0.5 | 2.3 $\pm$ 0.3 | 2.8 $\pm$ 0.5 | 3.7 $\pm$ 0.2 | 2.1 $\pm$ 0.5 | 2.4 $\pm$ 0.3 |
|    | HAB | 5.5           | 5.3           | 6.7           | 5             | 8.1           | 8.9           | 6.2           | 5.7           |
| PD | MAB | 2.7 $\pm$ 0.2 | 2.8 $\pm$ 0.2 | 3.2 $\pm$ 0.2 | 2.6 $\pm$ 0.1 | 3.5 $\pm$ 0.1 | 4.1 $\pm$ 0.4 | 3.6 $\pm$ 0.4 | 2.9 $\pm$ 0.1 |
|    | HAB | 5.5 $\pm$ 1.1 | 5.2 $\pm$ 0.7 | 6.1 $\pm$ 0.6 | 5.1 $\pm$ 0.8 | 6.0 $\pm$ 0.8 | 8.1 $\pm$ 1.1 | 6.2 $\pm$ 0.1 | 5.9 $\pm$ 1   |
| UC | MAB | 4.5 $\pm$ 0.3 | 4.4 $\pm$ 0.0 | 4.6 $\pm$ 0.3 | 4.0 $\pm$ 0.2 | 5.3 $\pm$ 0.1 | 6.2 $\pm$ 0.1 | 6.7 $\pm$ 0.1 | 4.3 $\pm$ 0.2 |
|    | HAB | 5.1 $\pm$ 0.5 | 4.4 $\pm$ 0.5 | 5.5 $\pm$ 0.1 | 4.5 $\pm$ 0.1 | 6.0 $\pm$ 0.3 | 7.9 $\pm$ 0.9 | 5.3 $\pm$ 0.6 | 4.9 $\pm$ 0.6 |

HC= healthy controls; PD = Parkinson's disease; UC = Asymptomatic LRRK2 mutation carriers; SN = Substantia nigra; WGM = whole gray matter; WWM = whole white matter

**Table S2.** Regional  $^{11}\text{C}$ -PBR28  $V_T/f_p$  estimated with Logan plot in healthy control, PD and asymptomatic LRRK2 mutation carriers, stratified by genotype.

|    |     | WGM         | WWM         | Putamen     | Caudate     | SN          | Midbrain     | Medulla     | Cerebellum  |
|----|-----|-------------|-------------|-------------|-------------|-------------|--------------|-------------|-------------|
| HC | MAB | 42 $\pm$ 16 | 41 $\pm$ 16 | 43 $\pm$ 11 | 39 $\pm$ 12 | 47 $\pm$ 16 | 62 $\pm$ 13  | 44 $\pm$ 13 | 40 $\pm$ 12 |
|    | HAB | 92          | 90          | 113         | 84.2        | 136         | 150          | 105         | 95          |
| PD | MAB | 40 $\pm$ 26 | 40 $\pm$ 24 | 44 $\pm$ 14 | 36 $\pm$ 13 | 51 $\pm$ 21 | 55 $\pm$ 17  | 53 $\pm$ 25 | 43 $\pm$ 19 |
|    | HAB | 74 $\pm$ 4  | 71 $\pm$ 1  | 81 $\pm$ 3  | 66 $\pm$ 6  | 78 $\pm$ 6  | 105 $\pm$ 8  | 80 $\pm$ 12 | 78 $\pm$ 5  |
| UC | MAB | 53 $\pm$ 3  | 52 $\pm$ 7  | 55 $\pm$ 3  | 47 $\pm$ 6  | 63 $\pm$ 7  | 73 $\pm$ 11  | 79 $\pm$ 11 | 51 $\pm$ 4  |
|    | HAB | 78 $\pm$ 22 | 73 $\pm$ 20 | 87 $\pm$ 21 | 71 $\pm$ 17 | 93 $\pm$ 20 | 121 $\pm$ 19 | 80 $\pm$ 12 | 75 $\pm$ 11 |

HC= healthy controls; PD = Parkinson's disease; UC = Asymptomatic LRRK2 mutation carriers; SN = Substantia nigra; WGM = whole gray matter; WWM = whole white matter

**Table S3.** Regional  $^{11}\text{C}$ -PBR28  $V_T$  estimated with MA1 plot in healthy control, PD and asymptomatic LRRK2 mutation carriers, stratified by genotype.

|    |     | WGM           | WWM           | Putamen       | Caudate       | SN            | Midbrain      | Medulla       | Cerebellum    |
|----|-----|---------------|---------------|---------------|---------------|---------------|---------------|---------------|---------------|
| HC | MAB | 2.5 $\pm$ 0.3 | 2.4 $\pm$ 0.4 | 2.8 $\pm$ 0.2 | 2.7 $\pm$ 0.4 | 3.1 $\pm$ 0.5 | 4.1 $\pm$ 0.1 | 3.1 $\pm$ 0.4 | 2.5 $\pm$ 0.3 |
|    | HAB | 5.5           | 5.4           | 7             | 5.1           | 9.2           | 10.9          | 7.6           | 5.7           |
| PD | MAB | 2.2 $\pm$ 0.2 | 2.8 $\pm$ 0.1 | 3.3 $\pm$ 0.2 | 2.7 $\pm$ 0.1 | 3.9 $\pm$ 0.3 | 4.2 $\pm$ 0.3 | 3.9 $\pm$ 0.4 | 3.1 $\pm$ 0.2 |
|    | HAB | 5.4 $\pm$ 1.1 | 5.2 $\pm$ 0.7 | 6.3 $\pm$ 0.5 | 5.1 $\pm$ 0.8 | 6.5 $\pm$ 0.4 | 8.9 $\pm$ 1.1 | 7.1 $\pm$ 1.1 | 5.8 $\pm$ 0.8 |
| UC | MAB | 4.5 $\pm$ 0.3 | 4.4 $\pm$ 0.1 | 4.9 $\pm$ 0.2 | 4.4 $\pm$ 0.1 | 5.8 $\pm$ 0.1 | 6.7 $\pm$ 0.3 | 7.3 $\pm$ 0.4 | 4.4 $\pm$ 0.2 |
|    | HAB | 5.1 $\pm$ 0.5 | 4.8 $\pm$ 0.5 | 5.7 $\pm$ 0.1 | 4.7 $\pm$ 0.1 | 7.2 $\pm$ 0.3 | 8.3 $\pm$ 0.9 | 6.1 $\pm$ 0.3 | 4.9 $\pm$ 0.6 |

HC= healthy controls; PD = Parkinson's disease; UC = Asymptomatic LRRK2 mutation carriers; SN = Substantia nigra; WGM = whole gray matter; WWM = whole white matter

**Table S4.** Regional  $^{11}\text{C}$ -PBR28  $V_T/f_p$  estimated with MA1 plot in healthy control, PD and asymptomatic LRRK2 mutation carriers, stratified by genotype.

|    |     | WGM   | WWM   | Putamen | Caudate | SN     | Midbrain | Medulla | Cerebellum |
|----|-----|-------|-------|---------|---------|--------|----------|---------|------------|
| HC | MAB | 43±16 | 42±16 | 47±12   | 46±16   | 52±17  | 68±15    | 55±13   | 42±13      |
|    | HAB | 93    | 90    | 117     | 86      | 155    | 184      | 127     | 97         |
| PD | MAB | 40±26 | 41±24 | 46±16   | 38±14   | 58±27  | 58±19    | 58±28   | 44±20      |
|    | HAB | 74±3  | 72±2  | 85±2    | 69±6    | 89±7   | 121±7    | 97±15   | 78±4       |
| UC | MAB | 53±3  | 52±6  | 57±5    | 52±8    | 68±9   | 79±6     | 85±6    | 51±3       |
|    | HAB | 79±22 | 74±20 | 89±22   | 73±18   | 112±26 | 126±21   | 93±20   | 75±10      |

HC= healthy controls; PD = Parkinson's disease; UC = Asymptomatic LRRK2 mutation carriers; SN = Substantia nigra; WGM = whole gray matter; WWM = whole white matter

**Table S5.** Regional  $^{11}\text{C}$ -PBR28  $V_T/f_p$  estimated with Logan plot in healthy control, PD and asymptomatic LRRK2 mutation carriers, stratified by genotype.

|    |     | WGM       | WWM       | Putamen   | Caudate   | SN        | Midbrain  | Medulla   | Cerebellum |
|----|-----|-----------|-----------|-----------|-----------|-----------|-----------|-----------|------------|
| HC | MAB | 0.48±0.05 | 0.47±0.04 | 0.5±0.05  | 0.43±0.06 | 0.61±0.04 | 0.81±0.14 | 0.64±0.11 | 0.45±0.04  |
|    | HAB | 0.95      | 0.89      | 1.07      | 0.87      | 1.14      | 1.46      | 1.13      | 0.98       |
| PD | MAB | 0.68±0.16 | 0.67±0.18 | 0.84±0.2  | 0.68±0.17 | 1.00±0.24 | 1.23±0.27 | 1.01±0.2  | 0.75±0.15  |
|    | HAB | 0.90±0.11 | 0.84±0.13 | 1.01±0.14 | 0.84±0.11 | 1.00±0.12 | 1.35±0.21 | 1.09±0.18 | 0.94±0.1   |
| UC | MAB | 0.77±0.02 | 0.76±0.02 | 0.8±0.04  | 0.67±0.03 | 1±0.12    | 1.15±0.12 | 1.17±0.07 | 0.74±0.03  |
|    | HAB | 0.92±0.08 | 0.85±0.07 | 0.95±0.05 | 0.8±0.09  | 1.12±0.05 | 1.47±0.15 | 1.09±0.23 | 0.92±0.13  |

HC= healthy controls; PD = Parkinson's disease; UC = Asymptomatic LRRK2 mutation carriers; SN = Substantia nigra; WGM = whole gray matter; WWM = whole white matter

### Quality measurement of principal component analysis

**Table S6.** Genotype and age of the raw data, coordinate, contribution of the observations to the components squared cosine of the observation for the absolute SUV PCA decomposition.

| Observation | Genotype | Age | F1    | F2    | Ctr 1(%) | Ctr 2(%) | Cosine <sup>2</sup> 1 | Cosine <sup>2</sup> 2 (10 <sup>-3</sup> ) |
|-------------|----------|-----|-------|-------|----------|----------|-----------------------|-------------------------------------------|
| HC          | MAB      | 24  | -1.81 | 0.15  | 9.3      | 2.1      | <b>0.98</b>           | 6.9309                                    |
| HC          | MAB      | 44  | -1.55 | -0.06 | 6.7      | 0.3      | <b>0.98</b>           | 1.5148                                    |
| HC          | MAB      | 46  | -1.23 | 0.00  | 4.3      | 0.0      | <b>0.95</b>           | 0.0088                                    |
| HC          | MAB      | 63  | -1.69 | 0.10  | 8.0      | 0.9      | <b>0.98</b>           | 3.3549                                    |
| HC          | HAB      | 37  | 1.13  | 0.18  | 3.6      | 2.9      | <b>0.91</b>           | 22.8041                                   |
| HC          | HAB      | 47  | 1.04  | 0.02  | 3.1      | 0.0      | <b>0.90</b>           | 0.2395                                    |
| HC          | HAB      | 53  | 1.39  | -0.19 | 5.4      | 3.4      | <b>0.95</b>           | 18.7070                                   |
| HC          | HAB      | 70  | 1.10  | -0.04 | 3.4      | 0.1      | <b>0.88</b>           | 1.0357                                    |
| HC          | HAB      | 73  | 0.25  | -0.22 | 0.2      | 4.3      | <b>0.35</b>           | 265.9207                                  |
| HC          | HAB      | 75  | 0.80  | -0.12 | 1.8      | 1.2      | <b>0.86</b>           | 18.0631                                   |
| HC          | HAB      | 80  | 0.87  | -0.38 | 2.1      | 13.0     | <b>0.74</b>           | 139.9935                                  |
| PD          | MAB      | 42  | -2.28 | -0.04 | 14.7     | 0.1      | <b>1.00</b>           | 0.2554                                    |
| PD          | MAB      | 45  | -0.96 | -0.32 | 2.6      | 9.2      | <b>0.88</b>           | 97.3724                                   |
| PD          | MAB      | 48  | -0.26 | 0.08  | 0.2      | 0.5      | <b>0.45</b>           | 39.1425                                   |
| PD          | MAB      | 57  | -1.25 | -0.06 | 4.4      | 0.3      | <b>0.96</b>           | 2.0437                                    |
| PD          | MAB      | 66  | 0.26  | 0.10  | 0.2      | 1.0      | <b>0.55</b>           | 85.6147                                   |
| PD          | MAB      | 66  | -0.71 | -0.09 | 1.4      | 0.7      | <b>0.91</b>           | 13.7263                                   |
| PD          | MAB      | 67  | -0.61 | -0.03 | 1.1      | 0.1      | <b>0.88</b>           | 2.4394                                    |
| PD          | MAB      | 69  | -1.24 | 0.04  | 4.3      | 0.1      | <b>0.97</b>           | 0.8846                                    |
| PD          | MAB      | 75  | 0.30  | 0.10  | 0.2      | 0.9      | <b>0.54</b>           | 63.4546                                   |
| PD          | MAB      | 78  | 0.44  | 0.28  | 0.5      | 7.1      | <b>0.49</b>           | 197.9208                                  |
| PD          | MAB      | 86  | 1.52  | 0.43  | 6.5      | 16.4     | <b>0.90</b>           | 70.2678                                   |
| PD          | HAB      | 48  | 1.26  | -0.20 | 4.5      | 3.7      | <b>0.95</b>           | 24.4233                                   |
| PD          | HAB      | 52  | 0.39  | -0.03 | 0.4      | 0.1      | <b>0.80</b>           | 3.7266                                    |
| PD          | HAB      | 56  | -0.18 | -0.24 | 0.1      | 5.1      | 0.27                  | <b>465.9003</b>                           |
| PD          | HAB      | 62  | 1.14  | -0.23 | 3.6      | 4.8      | <b>0.88</b>           | 35.8303                                   |
| UC          | MAB      | 37  | -0.24 | 0.18  | 0.2      | 3.0      | <b>0.34</b>           | 190.7016                                  |
| UC          | MAB      | 42  | 0.04  | -0.03 | 0.0      | 0.1      | 0.03                  | 19.5675                                   |
| UC          | MAB      | 54  | 0.07  | 0.24  | 0.0      | 5.4      | 0.04                  | <b>498.8454</b>                           |
| UC          | MAB      | 61  | 0.31  | 0.37  | 0.3      | 12.4     | 0.34                  | <b>495.5486</b>                           |
| UC          | MAB      | 64  | -0.55 | 0.03  | 0.8      | 0.1      | <b>0.86</b>           | 3.1726                                    |
| UC          | HAB      | 49  | 0.75  | -0.02 | 1.6      | 0.0      | <b>0.81</b>           | 0.7558                                    |
| UC          | HAB      | 55  | 0.29  | -0.06 | 0.2      | 0.3      | <b>0.53</b>           | 19.8147                                   |
| UC          | HAB      | 67  | 1.22  | 0.05  | 4.2      | 0.2      | <b>0.96</b>           | 1.6747                                    |

**Table S7.** Genotype and age of the raw data, coordinate, contribution of the observations to the components squared cosine of the observation for the SUV SRP-PCA decomposition.

| Observation | Genotype | Age | F1     | F2     | Ctr 1(%) | Ctr 2(%) | Cosine <sup>2</sup> 1 | Cosine <sup>2</sup> 2 |
|-------------|----------|-----|--------|--------|----------|----------|-----------------------|-----------------------|
| HC          | MAB      | 24  | 0.004  | -0.235 | 0.0      | 6.5      | 0.00                  | <b>0.62</b>           |
| HC          | MAB      | 44  | -0.164 | -0.107 | 2.3      | 1.4      | <b>0.29</b>           | 0.12                  |
| HC          | MAB      | 46  | -0.038 | 0.032  | 0.1      | 0.1      | 0.02                  | 0.01                  |
| HC          | MAB      | 63  | -0.046 | -0.236 | 6.8      | 6.6      | 0.02                  | <b>0.53</b>           |
| HC          | HAB      | 37  | 0.283  | 0.135  | 0.2      | 2.2      | <b>0.46</b>           | 0.11                  |
| HC          | HAB      | 47  | 0.181  | 0.314  | 2.8      | 11.7     | 0.17                  | <b>0.50</b>           |
| HC          | HAB      | 53  | -0.102 | 0.159  | 0.9      | 3.0      | 0.13                  | <b>0.30</b>           |
| HC          | HAB      | 70  | 0.078  | 0.185  | 0.5      | 4.1      | 0.03                  | 0.17                  |
| HC          | HAB      | 73  | -0.173 | 0.122  | 2.5      | 1.8      | <b>0.26</b>           | 0.13                  |
| HC          | HAB      | 75  | -0.111 | -0.024 | 1.0      | 0.1      | 0.16                  | 0.01                  |
| HC          | HAB      | 80  | -0.299 | 0.176  | 7.5      | 3.7      | <b>0.34</b>           | 0.12                  |
| PD          | MAB      | 42  | -0.178 | -0.152 | 2.7      | 2.8      | <b>0.48</b>           | 0.36                  |
| PD          | MAB      | 45  | -0.362 | 0.041  | 11.1     | 0.2      | <b>0.84</b>           | 0.01                  |
| PD          | MAB      | 48  | 0.053  | -0.043 | 0.2      | 0.2      | 0.04                  | 0.02                  |
| PD          | MAB      | 57  | -0.177 | -0.164 | 2.7      | 3.2      | <b>0.28</b>           | 0.24                  |
| PD          | MAB      | 66  | 0.154  | 0.067  | 2.0      | 0.5      | <b>0.36</b>           | 0.07                  |
| PD          | MAB      | 66  | -0.180 | -0.154 | 2.7      | 2.8      | <b>0.41</b>           | 0.30                  |
| PD          | MAB      | 67  | -0.032 | 0.054  | 0.1      | 0.3      | 0.02                  | 0.07                  |
| PD          | MAB      | 69  | -0.067 | -0.155 | 0.4      | 2.8      | 0.06                  | <b>0.33</b>           |
| PD          | MAB      | 75  | 0.076  | -0.108 | 0.5      | 1.4      | 0.08                  | 0.17                  |
| PD          | MAB      | 78  | 0.271  | -0.124 | 6.2      | 1.8      | <b>0.36</b>           | 0.07                  |
| PD          | MAB      | 86  | 0.503  | -0.040 | 21.3     | 0.2      | <b>0.73</b>           | 0.00                  |
| PD          | HAB      | 48  | -0.114 | 0.152  | 1.1      | 2.7      | 0.17                  | <b>0.29</b>           |
| PD          | HAB      | 52  | 0.017  | 0.080  | 0.0      | 0.8      | 0.01                  | 0.15                  |
| PD          | HAB      | 56  | -0.250 | 0.021  | 5.3      | 0.1      | <b>0.68</b>           | 0.01                  |
| PD          | HAB      | 62  | -0.054 | 0.368  | 0.2      | 16.0     | 0.01                  | <b>0.56</b>           |
| UC          | MAB      | 37  | 0.075  | -0.263 | 0.5      | 8.2      | 0.04                  | <b>0.55</b>           |
| UC          | MAB      | 42  | -0.057 | -0.046 | 0.3      | 0.2      | 0.06                  | 0.04                  |
| UC          | MAB      | 54  | 0.218  | -0.115 | 4.0      | 1.6      | <b>0.41</b>           | 0.11                  |
| UC          | MAB      | 61  | 0.370  | -0.095 | 0.4      | 1.1      | <b>0.72</b>           | 0.05                  |
| UC          | MAB      | 64  | -0.072 | -0.210 | 11.6     | 5.3      | 0.07                  | <b>0.61</b>           |
| UC          | HAB      | 49  | 0.079  | 0.196  | 0.5      | 4.6      | 0.04                  | 0.25                  |
| UC          | HAB      | 55  | -0.025 | 0.050  | 0.1      | 0.3      | 0.01                  | 0.03                  |
| UC          | HAB      | 67  | 1.22   | 0.05   | 4.2      | 0.2      | <b>0.96</b>           | 1.6747                |
